# Supplementary material for: Intramyocardial Injection of Human Adipose-Derived Stem Cells Ameliorates Cognitive Deficit By Regulating Oxidative Stress-Mediated Hippocampal Damage After Myocardial Infarction
Source: Research Square preprint supplement (doi:10.21203/rs.3.rs-648732/v1), 2021-07-07
Supplement: Supplementary file 1 [file 2c12ad6fc46e78504fa63cd7.docx]

**Supplementary Methods**

***Isolation of hADSCs***

hADSCs were purchased from the commercially available kits (Stempro hADSC kit; Invitrogen, Carlsbad, CA, U.S.A) and were generously provided by Gwo Xi Stem Cell Applied Technology (Hsinchu, Taiwan) as previously described (1,2). In brief, hADSCs were cultured in growth media (Low glucose DMEM (Invitrogen) media, 10% FBS (Serana), and 1% Penicillin/Streptomycin (Hyclone)) and were subcultured using TrypLE Express (Invitrogen) to subsequent passages. Passaged cultures will be deemed passage 1. hADSCs at passages 3–5 were used in this study. These hADSCs were homogeneous and did not contain endothelial cells or hematopoietic lineages. Cultured hADSCs have been shown to display mesenchymal stem cell phenotype: they express the mesenchymal stem cell marker CD90 and do not express hematopoietic markers CD31 and CD45. They will be confirmed to be >95% CD90+ and <2% CD31+/CD45+.

***Characterization of hADSC surface phenotype***

Trypsinized hADSCs were suspended in 100 μL PBS. Cells (1×105 per sample) were treated at room temperature for 20 min with the following specific anti-human antibodies: anti-Isotype IgG1-PE, -CD19-PE, -CD34-PE, -CD73-PE, -CD105-PE, -Isotype IgG1-FITC, -CD45-FITC, -CD90-FITC, -Isotype IgG2a-PE, -CD14-PE, -HLA-DR-PE (BD Biosciences, San Jose, CA, USA). Mouse IgG was used as a negative control condition. Fluorescent labeling was analyzed with a flow cytometer (Accuri C6; BD Biosciences, San Jose, CA, USA). The cell quality has been approved to be clinical-grade by the authority in Taiwan as we previously described (1). Besides, the hADSCs prepared by Gwo Xi Stem Cell Applied Technology have been used in clinical trial for liver cirrhosis and stroke (Topic: Clinical Trial Study About Human Adipose-Derived Stem Cells in the Liver Cirrhosis, ClinicalTrials.gov Identifier**:** NCT02297867; Clinical Trial Study About Human Adipose-Derived Stem Cells in the Stroke, ClinicalTrials.gov Identifier**:** NCT02813512).

***Hemodynamics and infarct size measurements***

Hemodynamic parameters were measured in anesthetized rats at the end of passive avoidance test(30th day after MI). A polyethylene Millar catheter was inserted into the LV and connected to a transducer (Model SPR-407; Miller Instruments, Houston, TX, USA) to measure LV systolic and diastolic pressure as the mean of measurements of five consecutive pressure cycles as previously described (2). The maximal rates of LV pressure rise (+dP/d*t*) and decrease (−dP/d*t*) were measured. After the arterial pressure measurement, the atria and the right ventricle were trimmed off, and the LV was rinsed in cold physiological saline, weighed, and immediately frozen in liquid nitrogen after a coronal section of the LV obtained for infarct size estimation. Each section was stained with hematoxylin and eosin and trichrome. The infarct size was determined as previously described (2). With respect to clinical importance, only rats with large infarction (>30%) were selected for analysis.

**References**

1. Lee TM, Harn HJ, Chiou TW, Chuang MH, Chen CH, Chuang CH, Lin PC, Lin SZ. [Remote transplantation of human adipose-derived stem cells induces regression of cardiac hypertrophy by regulating the macrophage polarization in spontaneously hypertensive rats.](https://pubmed.ncbi.nlm.nih.gov/31164286/) Redox Biol. 2019;27:101170.

2. Lee TM, Harn HJ, Chiou TW, Chuang MH, Chen CH, Lin PC, Lin SZ. [Targeting the pathway of GSK-3β/nerve growth factor to attenuate post-infarction arrhythmias by preconditioned adipose-derived stem cells.](https://www.ncbi.nlm.nih.gov/pubmed/28130118) J Mol Cell Cardiol. 2017;104:17-30.
